# Supplementary material for: A 2D porous pentiptycene-based MOF for efficient detection of Ba2+ and selective adsorption of dyes from water
Source: Royal Society of Chemistry journal article supplement (doi:10.1039/c8qi00098k), 2018-01-01
Supplement: c8qi00098k1.pdf [file c8qi00098k1.pdf]

**A 2D porous pentiptycene-based MOF for efficient detection of Ba<sup>2+</sup>  
and selective adsorption of dyes from water**

Minghui Zhang,<sup>a</sup> Ziqiang Qi,<sup>a</sup> Yang Feng,<sup>a</sup> Bingbing Guo,<sup>a</sup> Yujian Hao,<sup>a</sup> Zhuo Xu,<sup>a</sup> Liangliang Zhang,<sup>a\*</sup> and Daofeng Sun<sup>a</sup>

State Key Laboratory of Heavy Oil Processing, College of Science, China University of Petroleum (East China), Qingdao, Shandong 266580, P. R. China

Correspondence and requests for materials should be addressed to L. Z. (E-mail:

[liangliangzhang@upc.edu.cn](mailto:liangliangzhang@upc.edu.cn))

## 1. $^1\text{H}$ NMR spectrum of ligand $\text{H}_2\text{L}$ .

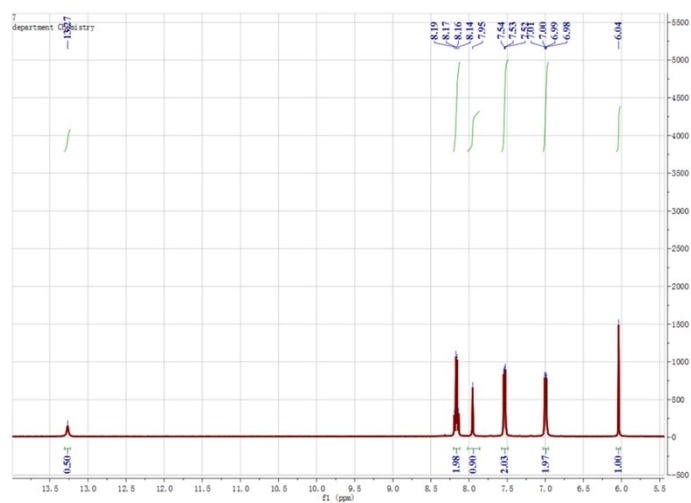

Figure S1.  $^1\text{H}$  NMR spectrum of ligand  $\text{H}_2\text{L}$ .

## 2. Crystal structure.

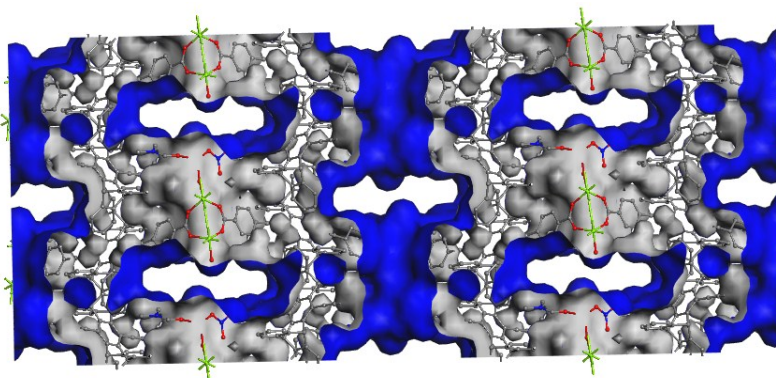

Figure S2. Connolly surface representation along the  $a$  axis.

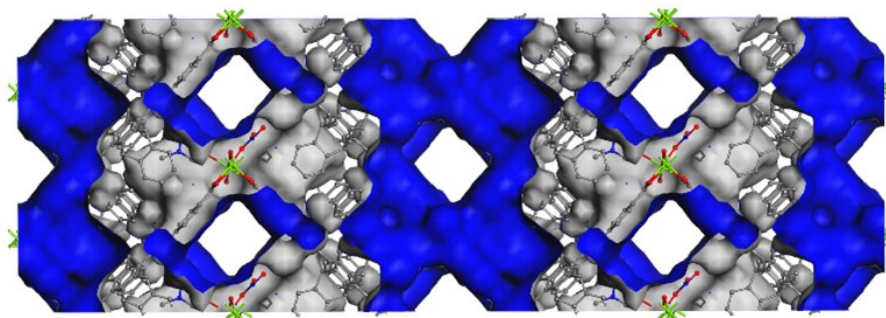

Figure S3. Connolly surface representation along the  $c$  axis.

### 3. Powder X-ray diffraction and thermogravimetric analysis.

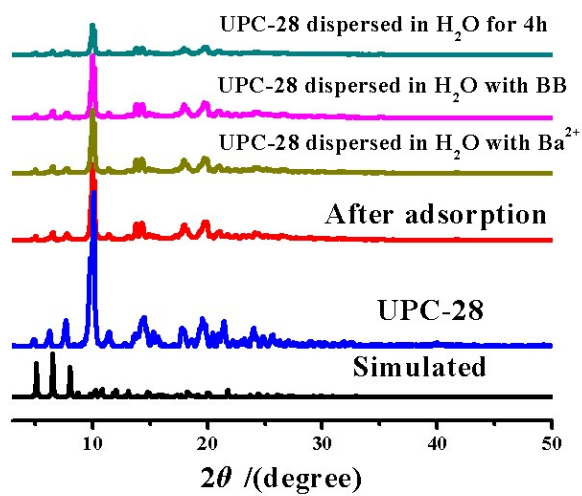

Figure S4. PXRD patterns of UPC-28.

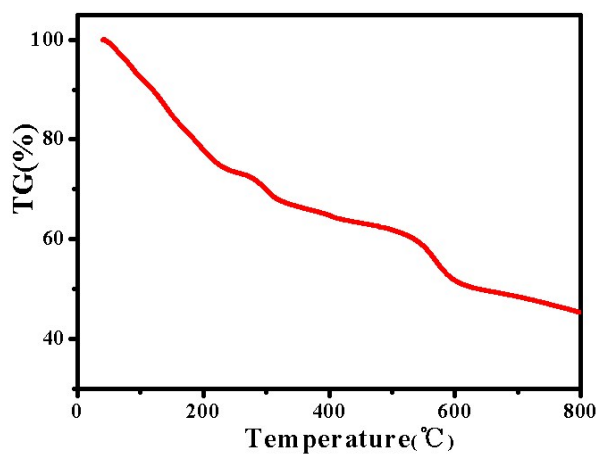

Figure S5. The TGA curve for UPC-28.

#### 4. Crystal data for UPC-28.

Table S1: Crystal Data for **UPC-28**

|                                               |                                                                      |
|-----------------------------------------------|----------------------------------------------------------------------|
| Identification code                           | <b>UPC-28</b>                                                        |
| Empirical formula                             | $C_{114}H_{80}Mg_3N_2O_{18}$                                         |
| Formula weight                                | 1838.73                                                              |
| Temperature/K                                 | 293(2)                                                               |
| Crystal system                                | monoclinic                                                           |
| Space group                                   | $P2_1/n$                                                             |
| $a/\text{\AA}$                                | 11.8132(2)                                                           |
| $b/\text{\AA}$                                | 34.5225(5)                                                           |
| $c/\text{\AA}$                                | 14.9681(3)                                                           |
| $\alpha/^\circ$                               | 90.00                                                                |
| $\beta/^\circ$                                | 101.5443(18)                                                         |
| $\gamma/^\circ$                               | 90.00                                                                |
| Volume/ $\text{\AA}^3$                        | 5980.80(19)                                                          |
| $Z$                                           | 2                                                                    |
| $\rho_{\text{calc}}/\text{cm}^3$              | 1.021                                                                |
| $\mu/\text{mm}^{-1}$                          | 0.701                                                                |
| $F(000)$                                      | 1916.0                                                               |
| Reflections collected                         | 21771                                                                |
| Independent reflections                       | 10657 [ $R_{\text{int}} = 0.0230$ ,<br>$R_{\text{sigma}} = 0.0343$ ] |
| Data/restraints/parameters                    | 10657/0/623                                                          |
| Goodness-of-fit on $F^2$                      | 1.081                                                                |
| Final R indexes [ $I \geq 2\sigma(I)$ ]       | $R_1 = 0.0759$ ,<br>$wR_2 = 0.2256$                                  |
| Final R indexes [all data]                    | $R_1 = 0.0866$ ,<br>$wR_2 = 0.2379$                                  |
| Largest diff. peak/hole / $e \text{\AA}^{-3}$ | 1.79/-0.81                                                           |

$$R_1 = \sum |F_o| - |F_c| / \sum |F_o|, wR_2 = [\sum w(F_o^2 - F_c^2)^2 / \sum w(F_o^2)^2]^{1/2}$$

## 5. Selected bond lengths (Å) and angles (°) for UPC-28.

Table S2: Selected bond lengths (Å) and angles (°) for UPC-28

|                                      |             |                                       |             |
|--------------------------------------|-------------|---------------------------------------|-------------|
| Mg1—Mg2 <sup>i</sup>                 | 3.6488 (11) | Mg1—Mg2                               | 3.6488 (11) |
| Mg1—O1                               | 2.0510 (17) | Mg1—O1 <sup>i</sup>                   | 2.0510 (17) |
| Mg1—O2                               | 2.0768 (19) | Mg1—O2 <sup>i</sup>                   | 2.0768 (18) |
| Mg1—O4                               | 2.145 (2)   | Mg1—O4 <sup>i</sup>                   | 2.145 (2)   |
| Mg2—O3 <sup>ii</sup>                 | 2.039 (2)   | Mg2—O4                                | 2.150 (2)   |
| Mg2—O5                               | 2.016 (2)   | Mg2—O6                                | 2.093 (2)   |
| Mg2—O7                               | 2.074 (2)   | Mg2—O16                               | 2.074 (3)   |
| Mg2 <sup>i</sup> —Mg1—Mg2            | 180.0       | O1 <sup>i</sup> —Mg1—Mg2 <sup>i</sup> | 70.99 (7)   |
| O1 <sup>i</sup> —Mg1—Mg2             | 109.01 (7)  | O1—Mg1—Mg2 <sup>i</sup>               | 109.02 (7)  |
| O1—Mg1—Mg2                           | 70.98 (7)   | O1—Mg1—O1 <sup>i</sup>                | 180.0       |
| O1—Mg1—O2 <sup>i</sup>               | 92.33 (8)   | O1 <sup>i</sup> —Mg1—O2               | 92.33 (8)   |
| O1—Mg1—O2                            | 87.67 (8)   | O1 <sup>i</sup> —Mg1—O2 <sup>i</sup>  | 87.67 (8)   |
| O1—Mg1—O4 <sup>i</sup>               | 87.20 (8)   | O1 <sup>i</sup> —Mg1—O4               | 87.20 (8)   |
| O1 <sup>i</sup> —Mg1—O4 <sup>i</sup> | 92.80 (8)   | O1—Mg1—O4                             | 92.80 (8)   |
| O2 <sup>i</sup> —Mg1—Mg2             | 110.88 (7)  | O2—Mg1—Mg2 <sup>i</sup>               | 110.88 (7)  |
| O2—Mg1—Mg2                           | 69.12 (7)   | O2 <sup>i</sup> —Mg1—Mg2 <sup>i</sup> | 69.12 (7)   |
| O2—Mg1—O2 <sup>i</sup>               | 180.00 (9)  | O2—Mg1—O4 <sup>i</sup>                | 87.54 (9)   |
| O2 <sup>i</sup> —Mg1—O4              | 87.54 (9)   | O2 <sup>i</sup> —Mg1—O4 <sup>i</sup>  | 92.46 (9)   |
| O2—Mg1—O4                            | 92.46 (9)   | O4 <sup>i</sup> —Mg1—Mg2              | 148.11 (6)  |
| O4—Mg1—Mg2 <sup>i</sup>              | 148.11 (6)  | O4 <sup>i</sup> —Mg1—Mg2 <sup>i</sup> | 31.89 (6)   |
| O4—Mg1—Mg2                           | 31.89 (6)   | O4—Mg1—O4 <sup>i</sup>                | 180.0       |
| O3 <sup>ii</sup> —Mg2—Mg1            | 68.83 (7)   | O3 <sup>ii</sup> —Mg2—O4              | 92.02 (9)   |
| O3 <sup>ii</sup> —Mg2—O6             | 88.99 (9)   | O3 <sup>ii</sup> —Mg2—O7              | 175.58 (12) |
| O3 <sup>ii</sup> —Mg2—O16            | 87.44 (11)  | O4—Mg2—Mg1                            | 31.80 (6)   |
| O5—Mg2—Mg1                           | 70.52 (8)   | O5—Mg2—O3 <sup>ii</sup>               | 91.34 (10)  |
| O5—Mg2—O4                            | 90.67 (10)  | O5—Mg2—O6                             | 178.15 (12) |
| O5—Mg2—O7                            | 92.68 (10)  | O5—Mg2—O16                            | 89.71 (12)  |
| O6—Mg2—Mg1                           | 111.29 (8)  | O6—Mg2—O4                             | 91.14 (9)   |
| O7—Mg2—Mg1                           | 114.32 (10) | O7—Mg2—O4                             | 89.77 (11)  |
| O7—Mg2—O6                            | 86.93 (10)  | O7—Mg2—O16                            | 90.74 (13)  |
| O16—Mg2—Mg1                          | 148.04 (9)  | O16—Mg2—O4                            | 179.34 (10) |
| O16—Mg2—O6                           | 88.48 (12)  | Mg1—O4—Mg2                            | 116.31 (9)  |

## 6. Gas sorption for UPC-28.

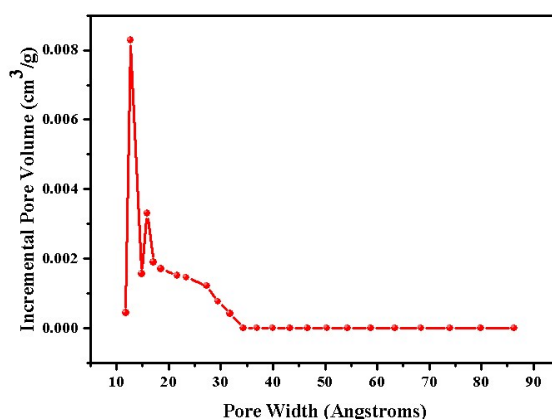

Figure S6. The pore size distribution of **UPC-28**.

Table S3: Equation parameters for the single-site Langmuir-Freundlich model.(CO<sub>2</sub>/N<sub>2</sub>)

| Adsorbates      | a (mmol/g) | b (kPa <sup>-1</sup> ) | c       | R <sup>2</sup> |
|-----------------|------------|------------------------|---------|----------------|
| CO <sub>2</sub> | 8.42992    | 0.00324                | 0.95741 | 1              |
| N <sub>2</sub>  | 0.25856    | 0.00431                | 1.13565 | 0.99952        |

Table S4: Equation parameters for the single-site Langmuir-Freundlich model.(CO<sub>2</sub>/CH<sub>4</sub>)

| Adsorbates      | a (mmol/g) | b (kPa <sup>-1</sup> ) | c       | R <sup>2</sup> |
|-----------------|------------|------------------------|---------|----------------|
| CO <sub>2</sub> | 8.42992    | 0.00324                | 0.95741 | 1              |
| CH <sub>4</sub> | 3.92289    | 0.00162                | 1.00498 | 0.99999        |

Table S5: Equation parameters for the single-site Langmuir-Freundlich model.(C<sub>2</sub>H<sub>2</sub>/CH<sub>4</sub>)

| Adsorbates                    | a (mmol/g) | b (kPa <sup>-1</sup> ) | c       | R <sup>2</sup> |
|-------------------------------|------------|------------------------|---------|----------------|
| C <sub>2</sub> H <sub>2</sub> | 174.31333  | 0.000231               | 0.75931 | 0.99706        |
| CH <sub>4</sub>               | 3.92289    | 0.00162                | 1.00498 | 0.99999        |

Table S6: Equation parameters for the single-site Langmuir-Freundlich model.( C<sub>2</sub>H<sub>2</sub>/ C<sub>2</sub>H<sub>6</sub> )

| Adsorbates                    | a (mmol/g) | b (kPa <sup>-1</sup> ) | c       | R <sup>2</sup> |
|-------------------------------|------------|------------------------|---------|----------------|
| C <sub>2</sub> H <sub>2</sub> | 174.31333  | 0.000231               | 0.75931 | 0.99706        |
| C <sub>2</sub> H <sub>6</sub> | 0.71729    | 0.003                  | 1.2934  | 0.9966         |

Table S7: Equation parameters for the single-site Langmuir-Freundlich model.( C<sub>3</sub>H<sub>6</sub>/ C<sub>3</sub>H<sub>8</sub> )

| Adsorbates                    | a (mmol/g) | b (kPa <sup>-1</sup> ) | c       | R <sup>2</sup> |
|-------------------------------|------------|------------------------|---------|----------------|
| C <sub>3</sub> H <sub>6</sub> | 1.27756    | 0.00232                | 1.34523 | 0.99728        |
| C <sub>3</sub> H <sub>8</sub> | 1.87636    | 0.0001158              | 1.58799 | 0.99357        |

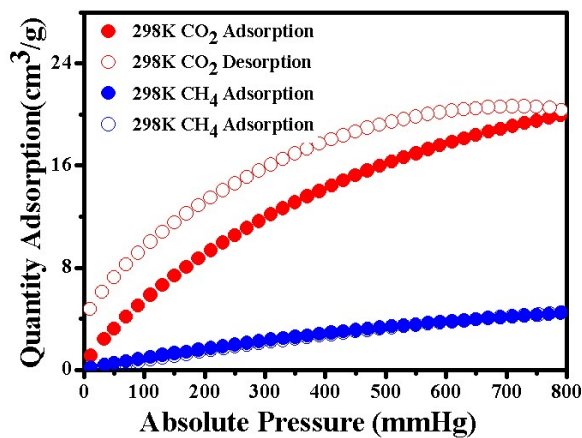

Figure S7. The CO<sub>2</sub> and CH<sub>4</sub> adsorption capacity for UPC-28 at 298K.

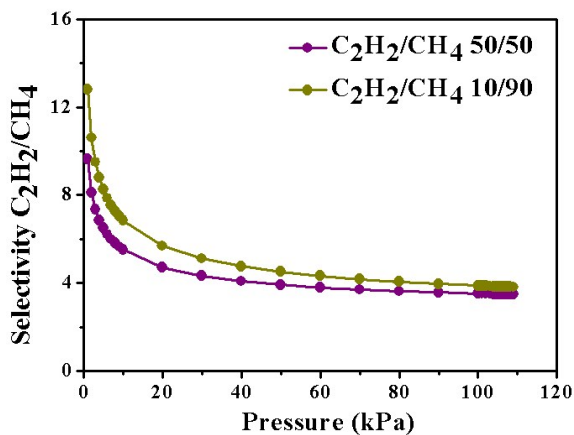

Figure S8. The C<sub>2</sub>H<sub>2</sub>/ CH<sub>4</sub> selectivity for UPC-28 at 273 K calculated by the IAST method for two C<sub>2</sub>H<sub>2</sub> concentrations (C<sub>2</sub>H<sub>2</sub>/ CH<sub>4</sub>: 10/90 and 50/50) in C<sub>2</sub>H<sub>2</sub>/ CH<sub>4</sub> binary mixtures.

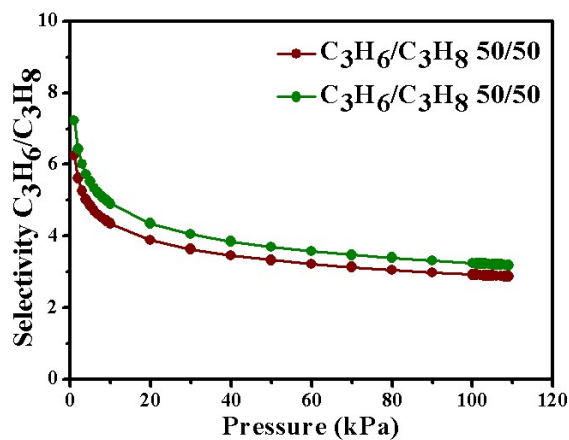

Figure S9. The C<sub>3</sub>H<sub>6</sub>/ C<sub>3</sub>H<sub>8</sub> selectivity for UPC-28 at 273 K calculated by the IAST method for two C<sub>3</sub>H<sub>6</sub> concentrations (C<sub>3</sub>H<sub>6</sub>/ C<sub>3</sub>H<sub>8</sub>: 10/90 and 50/50) in C<sub>3</sub>H<sub>6</sub>/ C<sub>3</sub>H<sub>8</sub> binary mixtures.

7. Luminescence spectra of the UPC-28 dispersed in aqueous solutions with different metal ions.

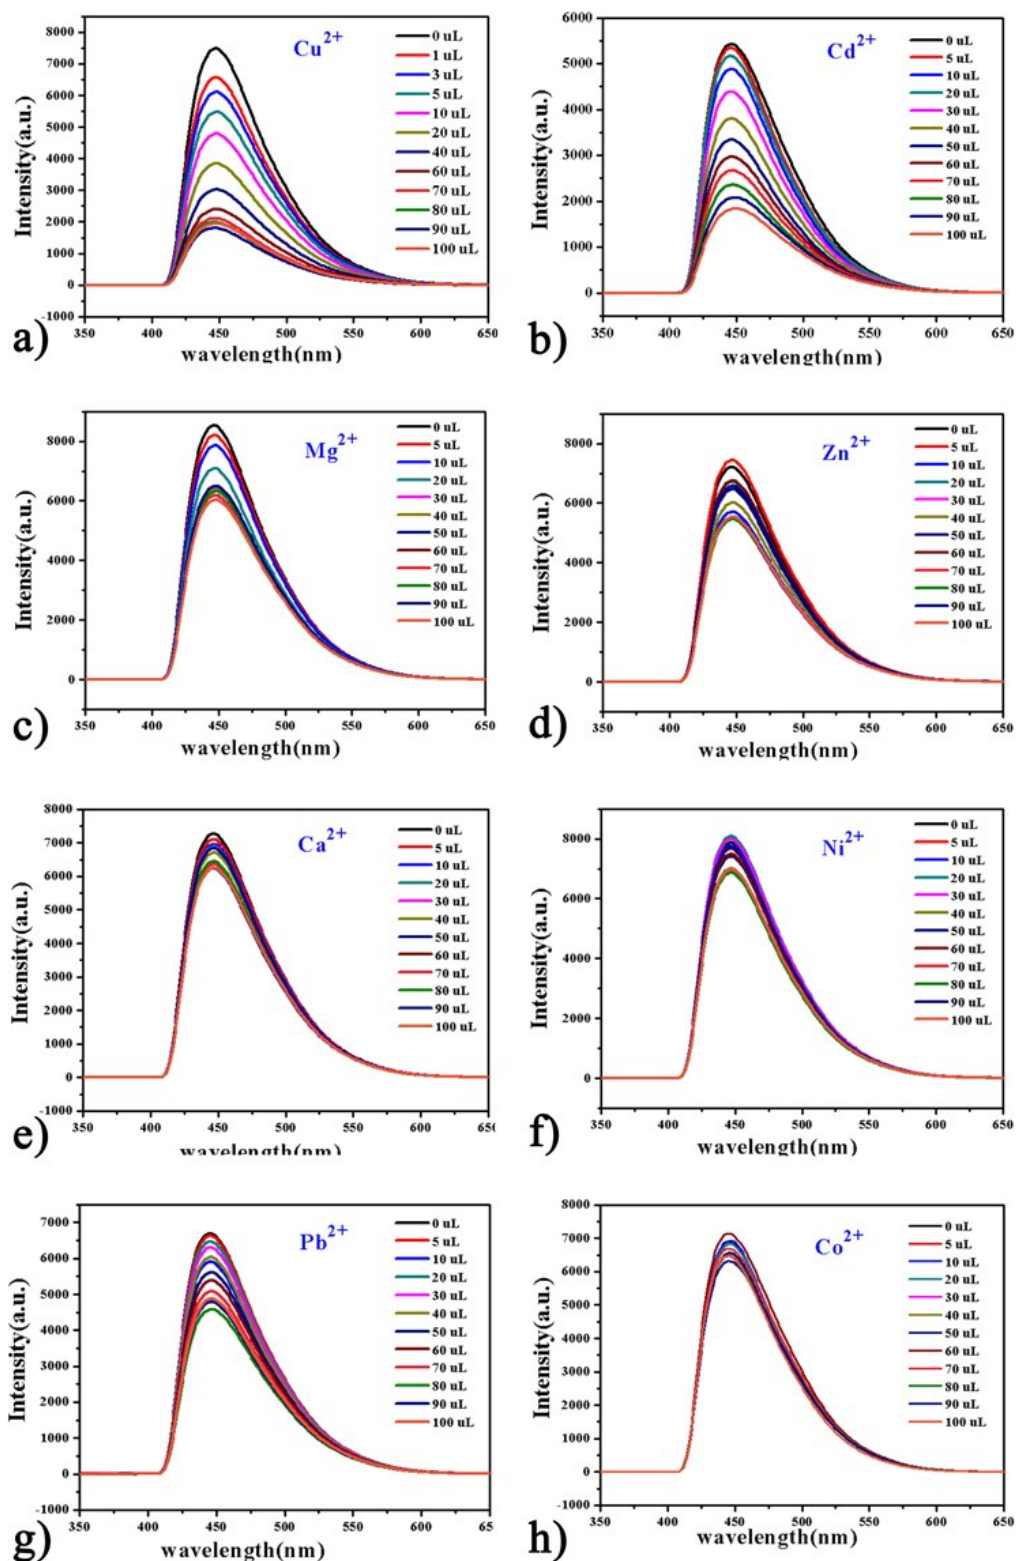

Figure S10. Fluorescent spectra of 2 mg/mL UPC-28 dispersed in aqueous solution treated with: a)  $\text{Cu}^{2+}$ , b)  $\text{Cd}^{2+}$ , c)  $\text{Mg}^{2+}$ , d)  $\text{Zn}^{2+}$ , e)  $\text{Ca}^{2+}$ , f)  $\text{Ni}^{2+}$ , g)  $\text{Pb}^{2+}$  and h)  $\text{Co}^{2+}$



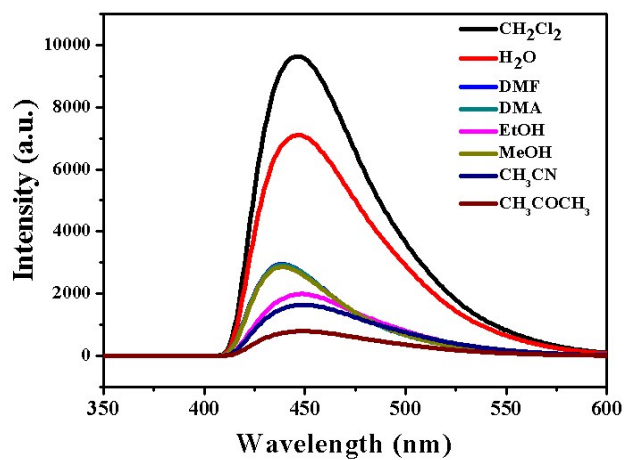

Figure S11. Fluorescent spectra of UPC-28 dispersed in different solvents.

### 8. Adsorption of dye molecules.

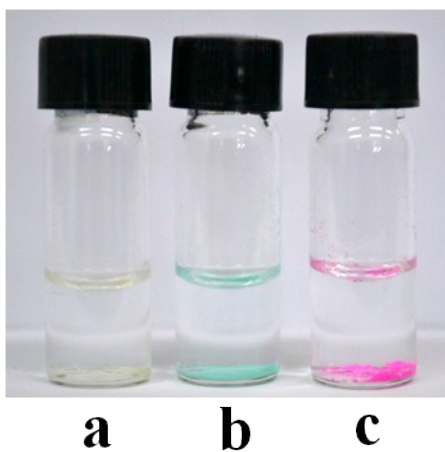

Figure S12. (a) Photographs of UPC-28 in aqueous solutions; (b) Photographs of UPC-28 in MB aqueous solutions after interaction; (c) Photographs of UPC-28 in RhB aqueous solutions after interaction.
